# Supplementary material
Source: MDPI journal article supplement (https://www.mdpi.com/2072-4292/14/5/1074)
Supplement: s1 [file s1 › remotesensing-1544491-supplementary.pdf]

**Table S1.** Settlement area and population datasets used in land efficiency modelling, ordered by scale.

|                       | Build-up Data                                                                                                                            | Input data/ Method                                                                                                                                                                                                                                                                                                                     | Population Data                                                                                                              | Input Data/ Methods                                                  | Area                                   |
|-----------------------|------------------------------------------------------------------------------------------------------------------------------------------|----------------------------------------------------------------------------------------------------------------------------------------------------------------------------------------------------------------------------------------------------------------------------------------------------------------------------------------|------------------------------------------------------------------------------------------------------------------------------|----------------------------------------------------------------------|----------------------------------------|
| Schiavina et al. [18] | GHS-Built (JRC) (1975, 1990, 2000, 2015)                                                                                                 | Satellite imagery (Landsat)/ Artificial intelligence and machine learning                                                                                                                                                                                                                                                              | GHS-POP (1975, 1990, 2000, 2015)                                                                                             | Census data (CIESIN GPW), GHS-BUILT/ Disaggregation to build-up area | global                                 |
| Wang et al. [20]      | China's Land Use/Cover Datasets (CLUDs) (Data Centre for Resources and Environmental Sciences) (1990, 2000, 2010)                        | Landsat Thematic Mapper, Enhanced Thematic Mapper (TM/ETM+)                                                                                                                                                                                                                                                                            | Census Data (The Fourth, Fifth, Sixth National Population Census, National Bureau of Statistics of China) (1990, 2000, 2010) | Census Data/ Disaggregation to 1 km x1 km grid                       | country (China)                        |
| Nicolau et al. [21]   | COC (DGT—Directorate-General for Territory) (2007, 2010, 2015)<br>CLC (EEA—European Environment Agency) (1990, 2000, 2006, 2012)         | Landsat 4/5 TM, Landsat 7 ETM<br>SPOT-4/5, IRS P6 LISS III<br>IRS P6 LISS III, RapidEye<br>Sentinel-2A/B, Landsat 8/<br>computer-assisted photo-interpretation                                                                                                                                                                         | Census Data (2001,2006, 2007, 2011, 2015)                                                                                    | Census Data/ Aggregation to municipalities                           | country (Portugal)                     |
| Zhou et al. [19]      | 1. GAIA (1985–2018)<br>2. GHS-Built (1975, 1990, 2000, 2015)<br>3. GLC_FCS-2020 (2020)<br>4. GlobeLand30 (2000, 2010, 2020)              | 1. Landsat TM, ETM+, OLI, VIIRS NTL, Sentinel-1 SAR/ Exclusion–inclusion algorithm and temporal consistency check<br>2. Landsat MSS, TM, ETM+ /Symbolic machine learning<br>3. Landsat 8 surface reflectance, Sentinel-1 SAR/ Random forest classifier<br>4. Landsat TM, ETM+, OLI, HJ-1/ POK (based on pixels, objects and knowledge) | WorldPop (2000, 2005, 2010, 2015, 2020)                                                                                      | Landsat ETM+/ machine learning and asymmetric modelling              | country (China)                        |
| Mudau et al. [9]      | Satellite Imagery—SPOT 5, SPOT 2, Landsat 5 (United States Geological Survey (USGS) and the South African National Space Agency (SANSA)) | SPOT 5/<br>Artificial Intelligence and symbolic machine learning which use radiometric, textural morphological features and reference data<br>Landsat 5 and SPOT 2/ kNN object-based image analysis technique used textural and radiometric value (1996, 2001)                                                                         | Census Data Statistics South Africa (1996, 2001, 2011)                                                                       | Census Data/ Disaggregation to sub-place unit                        | local (sub-place unit in South Africa) |
| Aquilino et al. [22]  | 1. The European Settlement Map (Copernicus Land Monitoring Services) (2012)<br>2. Satellite Imagery—Sentinel-2 images (2019-2020)        | 1.SPOT 5 and SPOT 6 / Automated classification based on machine learning.<br>2.Sentinel-2 images (the United States Geological Survey (USGS) Earth Explorer/ support-vector machine (SVM) classifier                                                                                                                                   | Census Data (the Italian National Institute of Statistics) (2001, 2011, 2019)<br>Urban Atlas (2012, 2018)                    | Census data/ Dasymetric Mapping Method                               | local (Bari, Italy)                    |
